# Supplementary material for: Benign recurrent lymphocytic meningitis (Mollaret's meningitis) in Denmark: a nationwide cohort study
Source: PubMed Central journal article supplement (PMC11235955; doi:10.1111/ene.16081), 2023-10-05

**Supplementary material to: Benign recurrent lymphocytic meningitis (Mollaret's meningitis)  
in Denmark: a nationwide cohort study**

**Supplementary Figure 1. Unfavourable functional outcomes (Glasgow Outcome Scale scores of 1-4) by time after discharge in adults with benign recurrent lymphocytic meningitis and single-episode herpes simplex virus type 2 (only pre-morbid full-time occupations).**

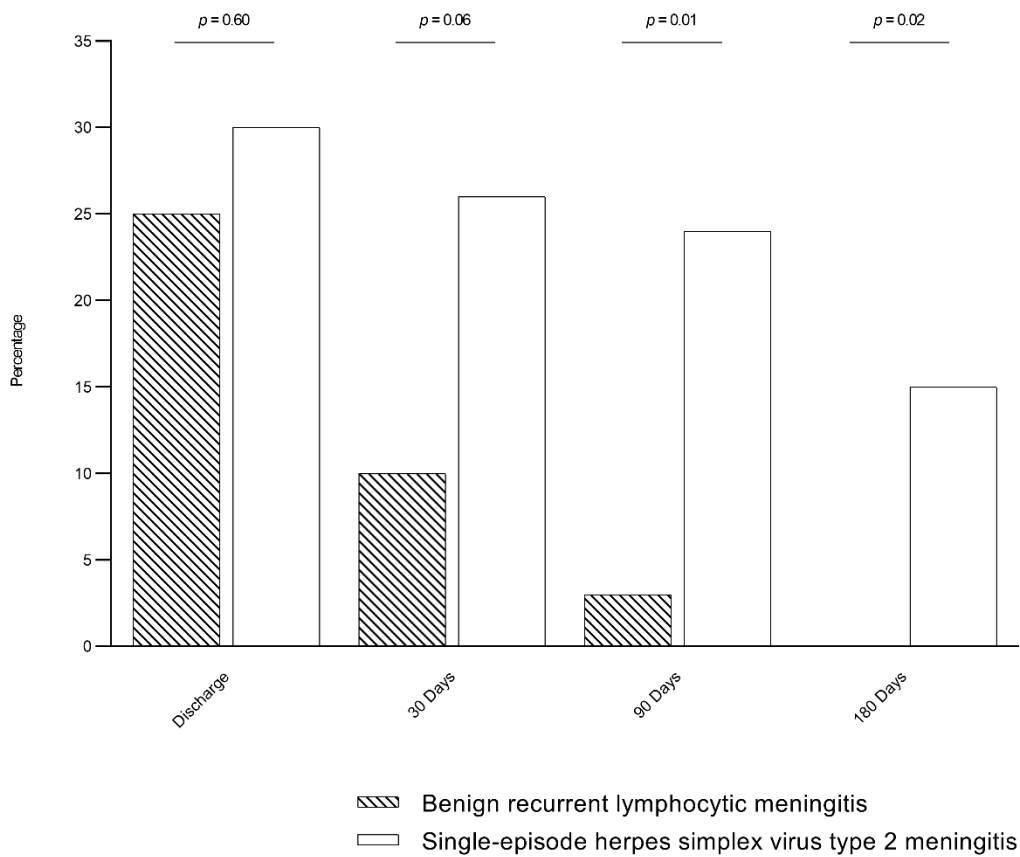

Supplement: ENE-31-e16081-s001.pdf [file ENE-31-e16081-s001.pdf]
